# Supplementary material for: A multi-model CMIP6-PMIP4 study of Arctic sea ice at 127 ka: sea ice data compilation and model differences
Source: Copernicus journal article supplement (doi:10.5194/cp-17-37-2021), 2021-01-11
Supplement: Supplementary file 1 [file cp-17-37-2021-supplement.zip]

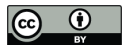

## *Supplement of*

# **A multi-model CMIP6-PMIP4 study of Arctic sea ice at 127 ka: sea ice data compilation and model differences**

**Masa Kageyama et al.**

*Correspondence to:* Masa Kageyama (masa.kageyama@lsce.ipsl.fr)

- cp-17-37-2021-supplement-title-page.pdf
- cp-2019-165-diags
  - ACCESS\_sea-ice-diags\_cp-2019-165.nc
  - AWIESM1\_sea-ice-diags\_cp-2019-165.nc
  - AWIESM2\_sea-ice-diags\_cp-2019-165.nc
  - CESM2\_psl\_cp-2019-165.nc
  - CESM2\_sea-ice-diags\_cp-2019-165.nc
  - CNRM6\_psl\_cp-2019-165.nc
  - CNRM\_sea-ice-diags\_cp-2019-165.nc
  - EC-Earth\_sea-ice-diags\_cp-2019-165.nc
  - FGOALS-g3\_psl\_cp-2019-165.nc
  - FGOALS-g3\_sea-ice-diags\_cp-2019-165.nc
  - GISS-E2G\_psl\_cp-2019-165.nc
  - GISS-E2G\_sea-ice-diags\_cp-2019-165.nc
  - INM4-8\_psl\_cp-2019-165.nc
  - INM4-8\_sea-ice-diags\_cp-2019-165.nc
  - IPSL\_psl\_cp-2019-165.nc
  - IPSL\_sea-ice-diags\_cp-2019-165.nc
  - LIG\_paper\_fig10.txt
  - LIG\_paper\_fig2.txt
  - LIG\_paper\_fig3.txt
  - LIG\_paper\_fig8.txt
  - LIG\_paper\_fig9.txt
  - LOVECLIM\_sea-ice-diags\_cp-2019-165.nc

- MIROC-ES2L\_psl\_cp-2019-165.nc
- MIROC-ES2L\_sea-ice-diags\_cp-2019-165.nc
- MMM\_sea-ice-diags\_cp-2019-165.nc
- NESM3\_psl\_cp-2019-165.nc
- NESM3\_sea-ice-diags\_cp-2019-165.nc
- NORESM2\_psl\_cp-2019-165.nc
- NORESM2\_sea-ice-diags\_cp-2019-165.nc
- NORESM\_psl\_cp-2019-165.nc
- NORESM\_sea-ice-diags\_cp-2019-165.nc
- UKESM\_psl\_cp-2019-165.nc
- UKESM\_sea-ice-diags\_cp-2019-165.nc

The copyright of individual parts of the supplement might differ from the CC BY 4.0 License.
